# Supplementary material
Source: PubMed Central journal article supplement (PMC4760191)

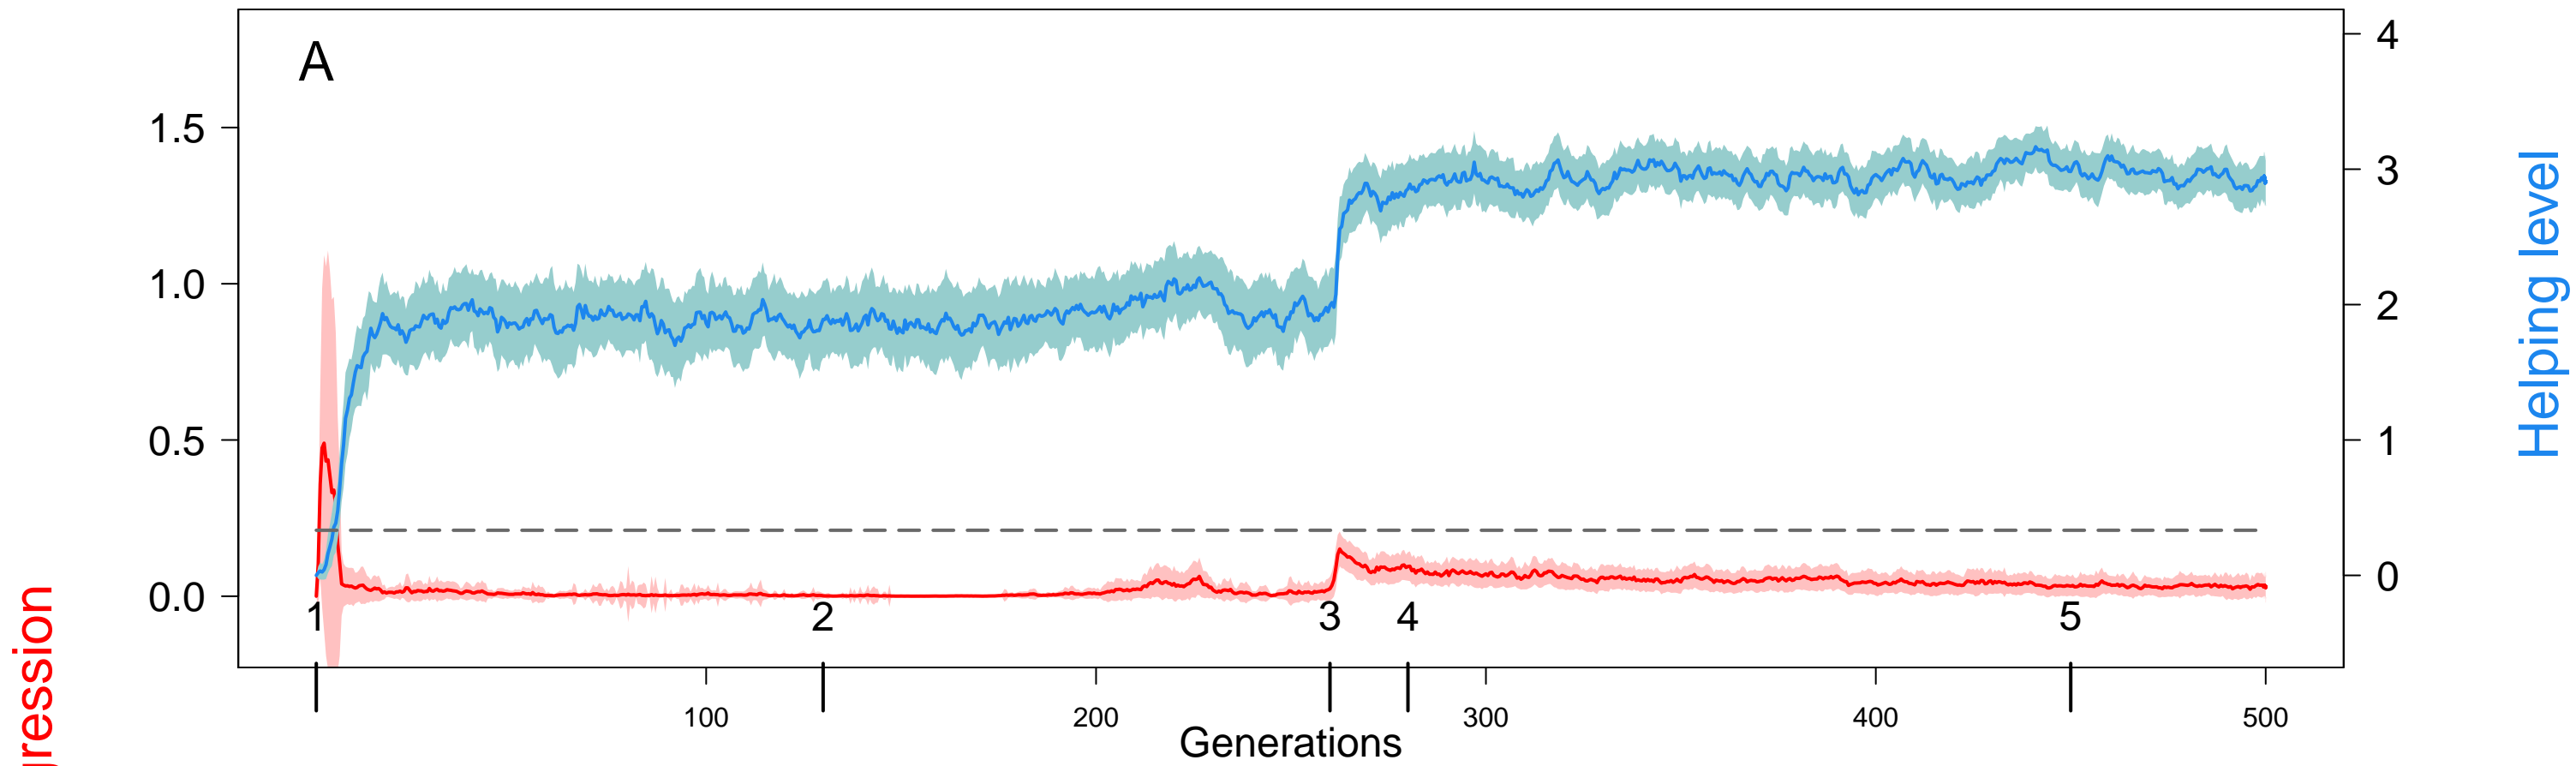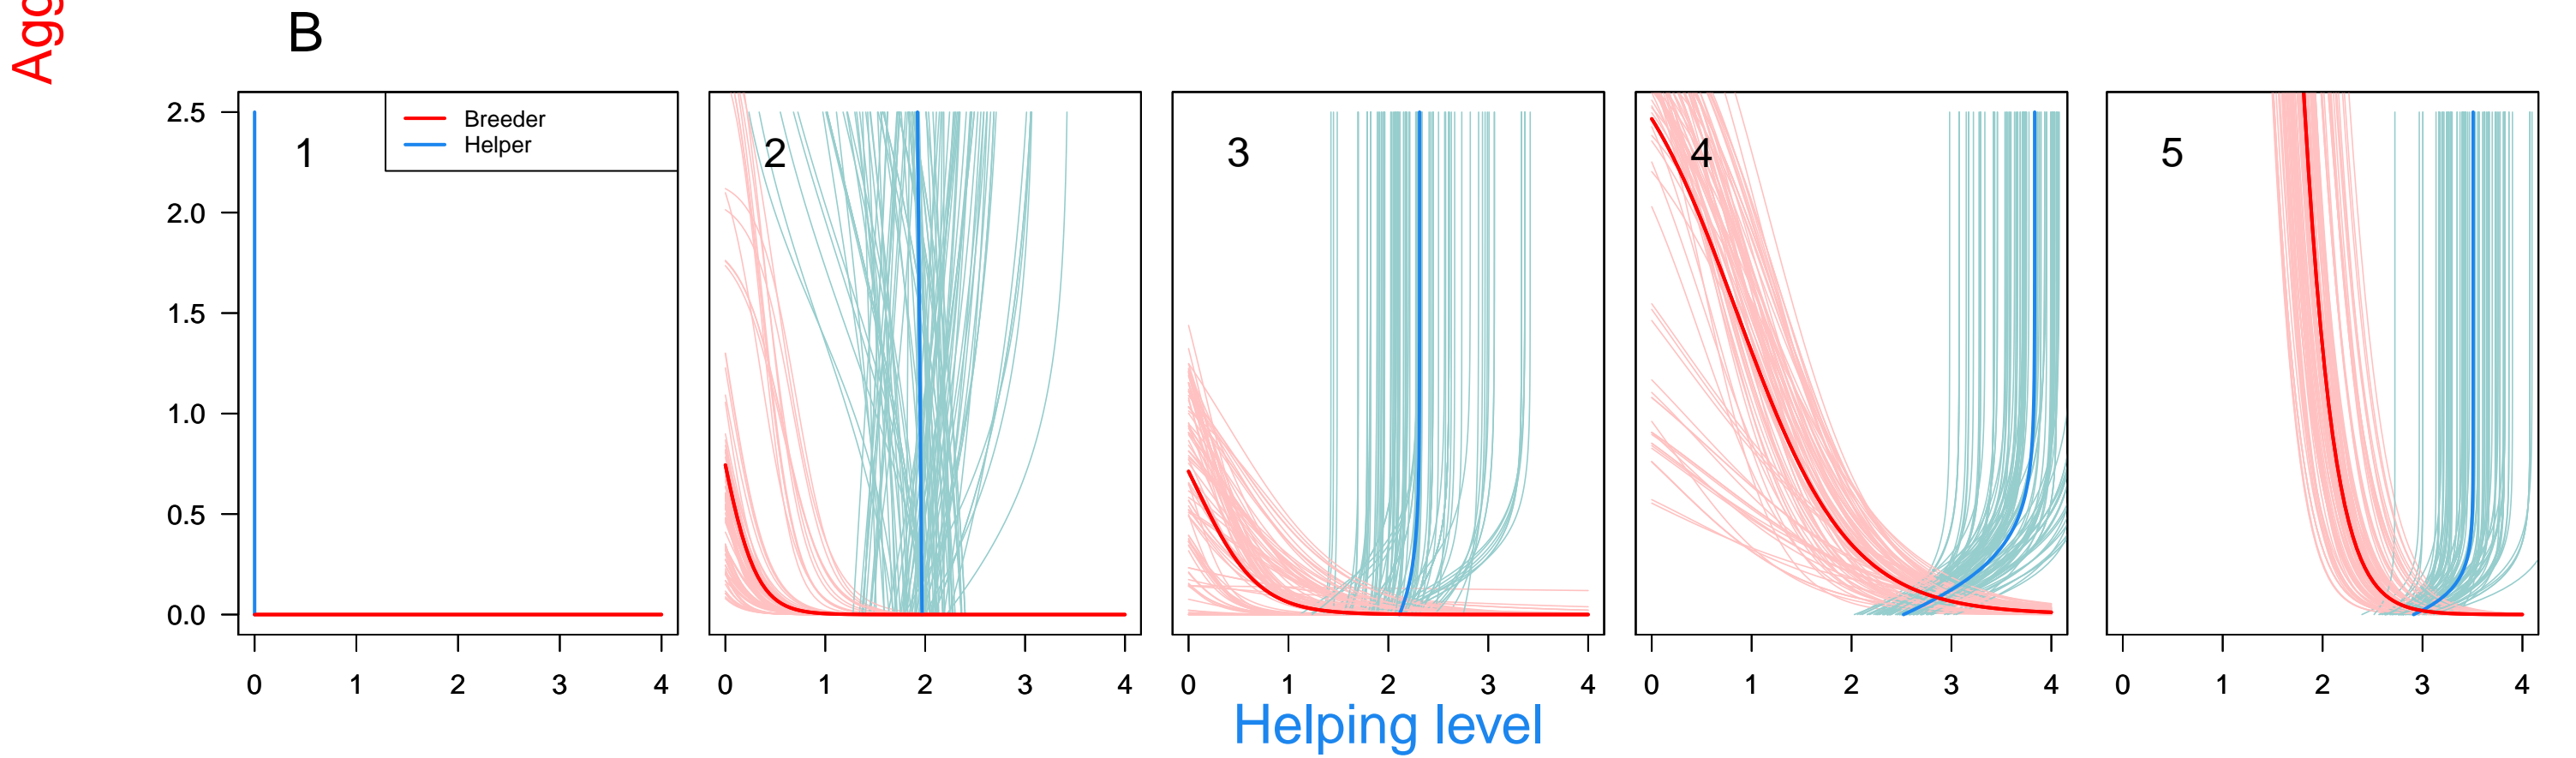

Supplement: rstb20150089supp2.pdf [file rstb20150089supp2.pdf]

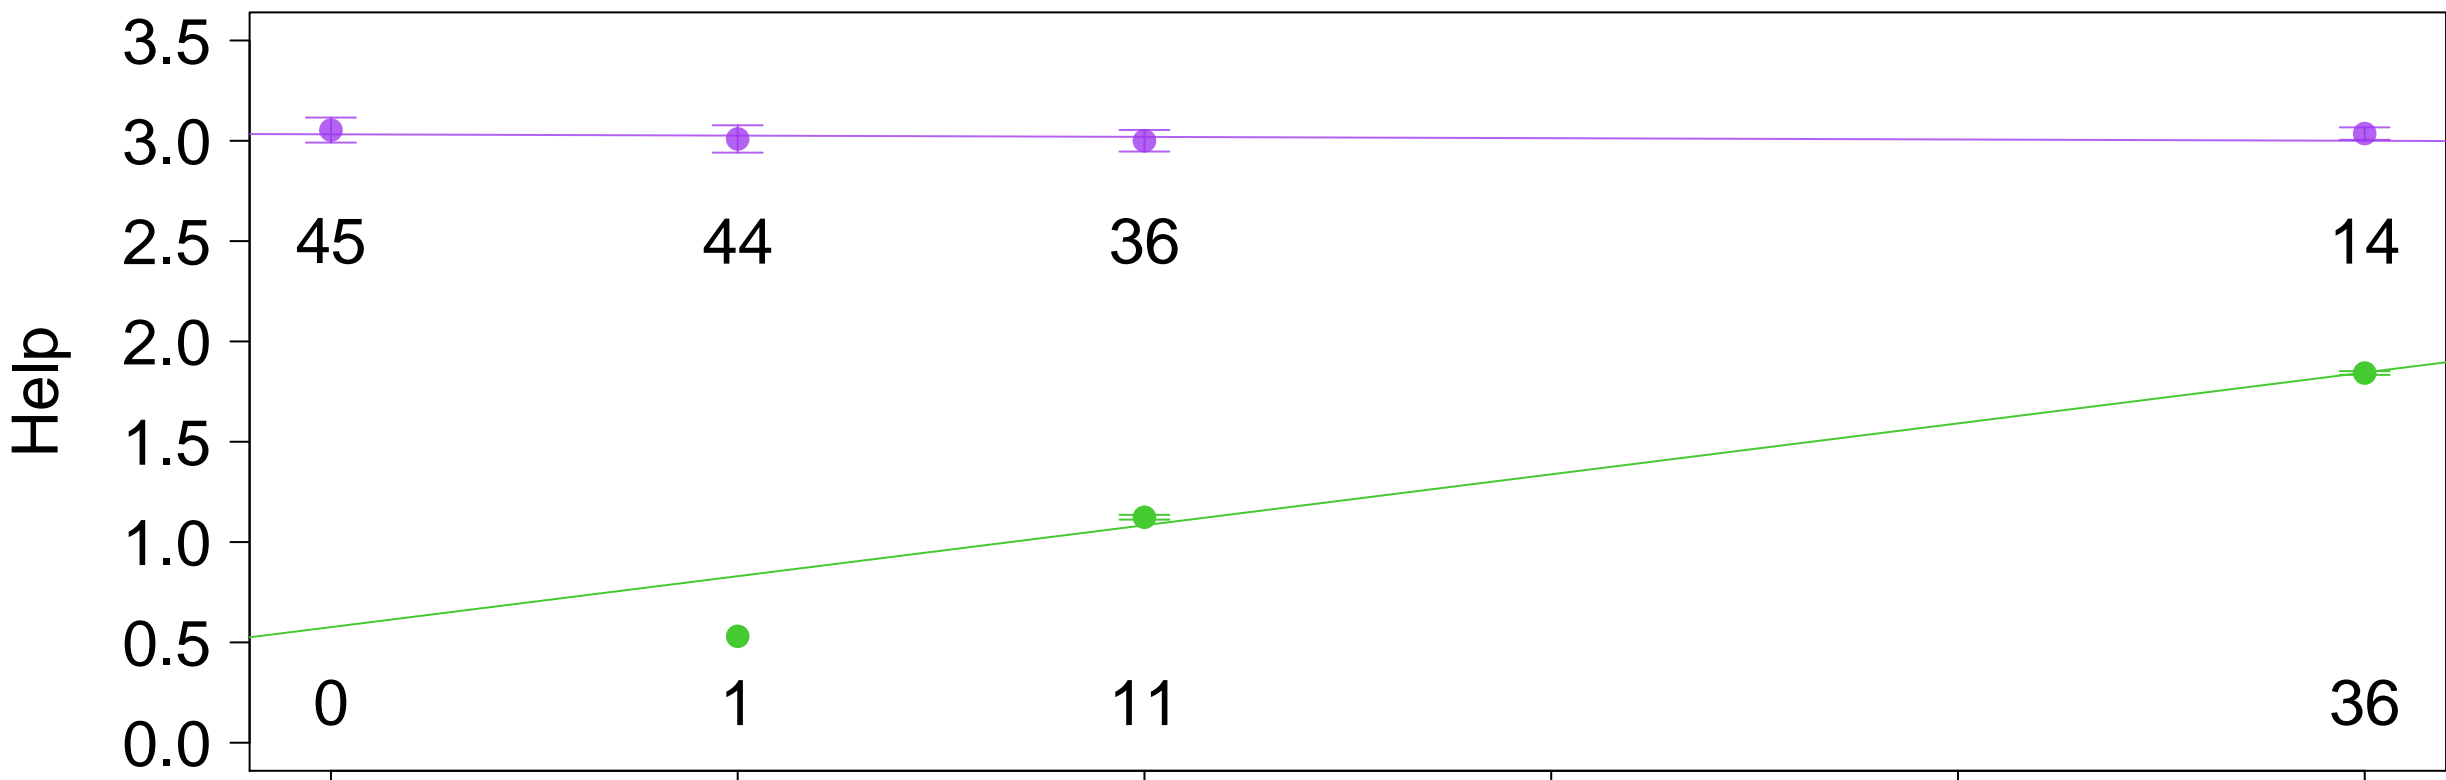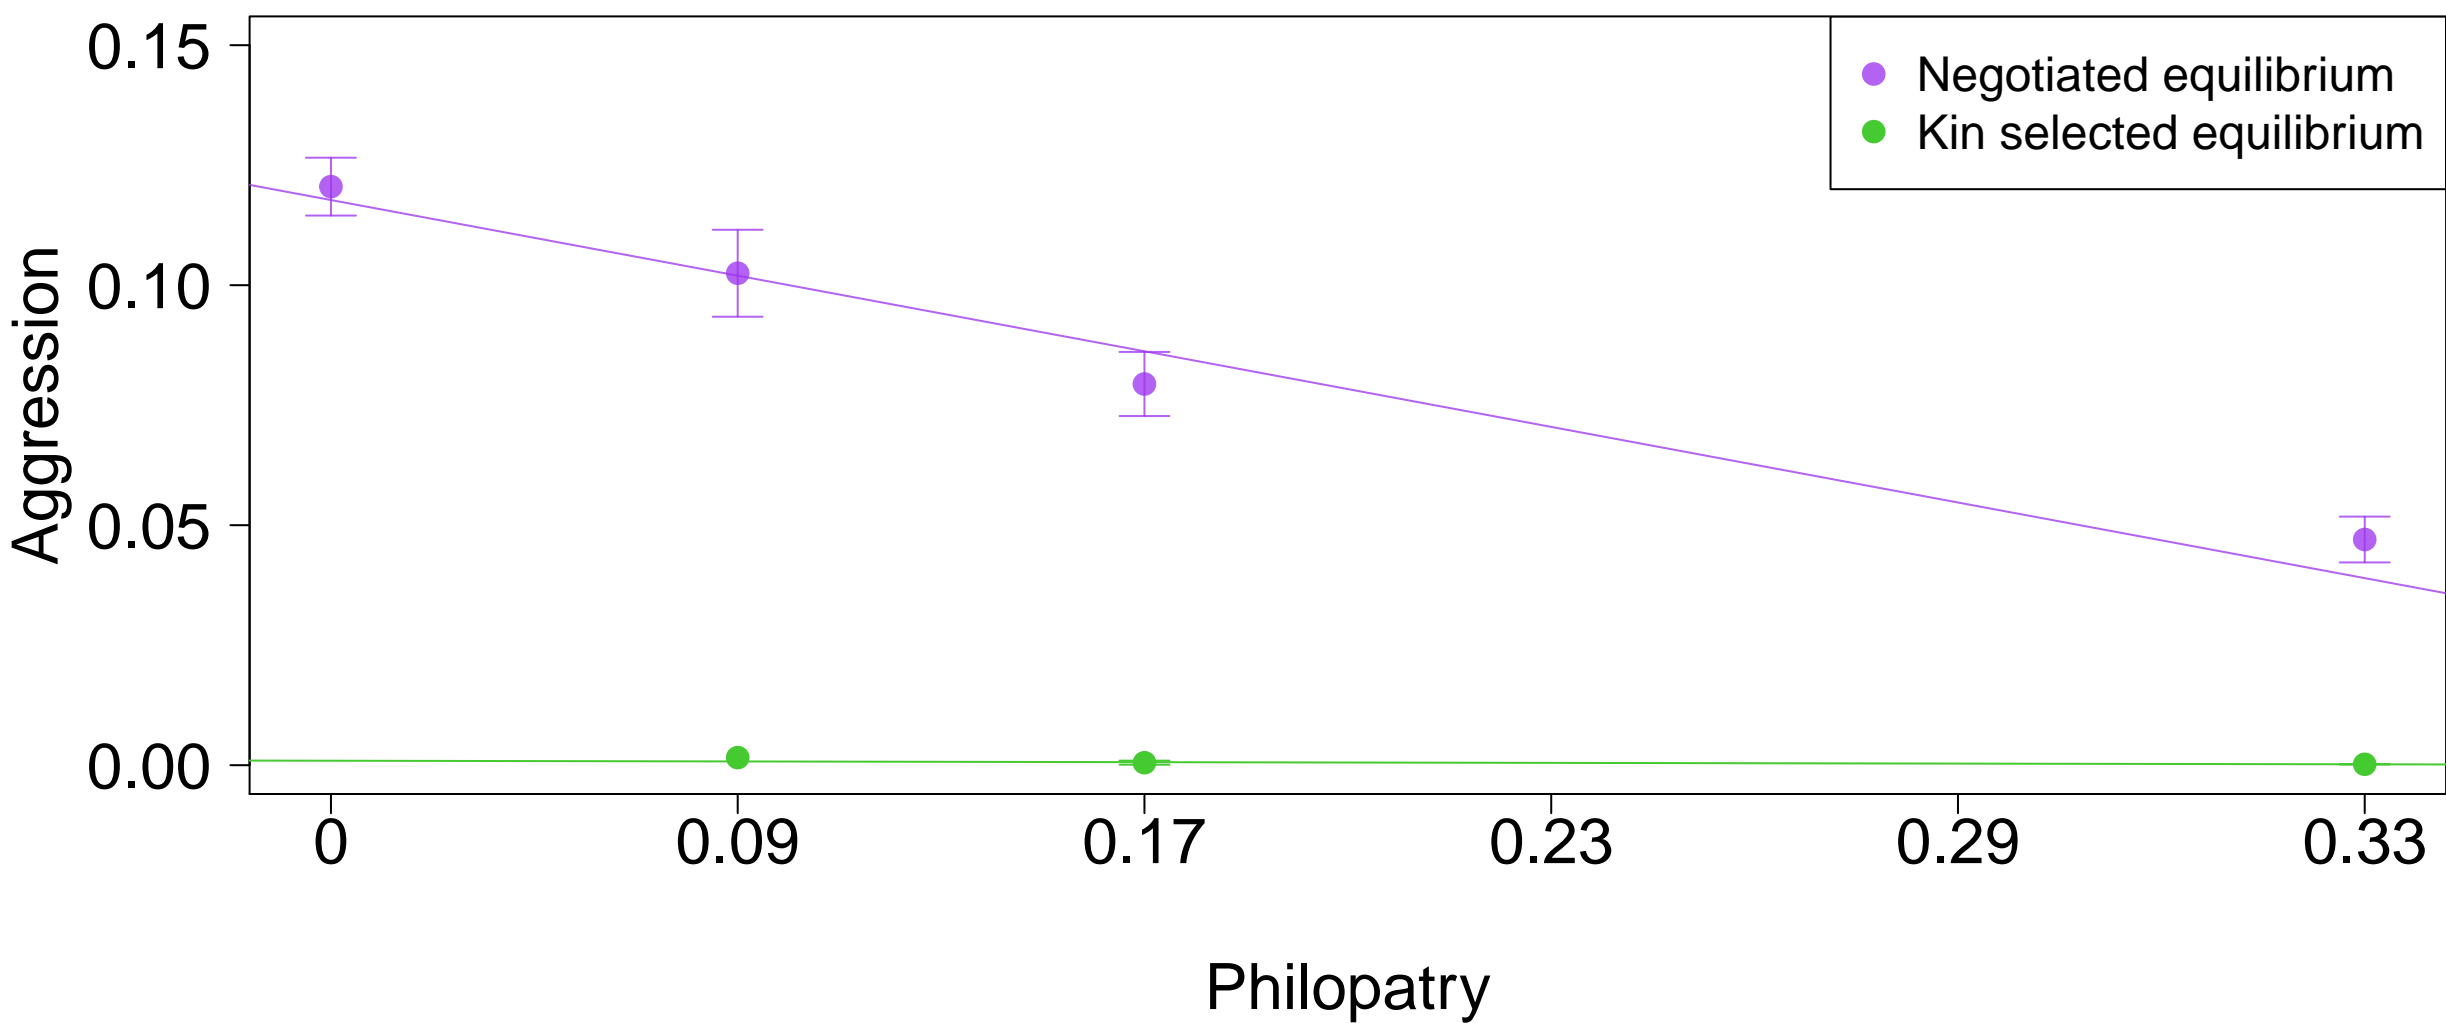

Supplement: rstb20150089supp3.pdf [file rstb20150089supp3.pdf]

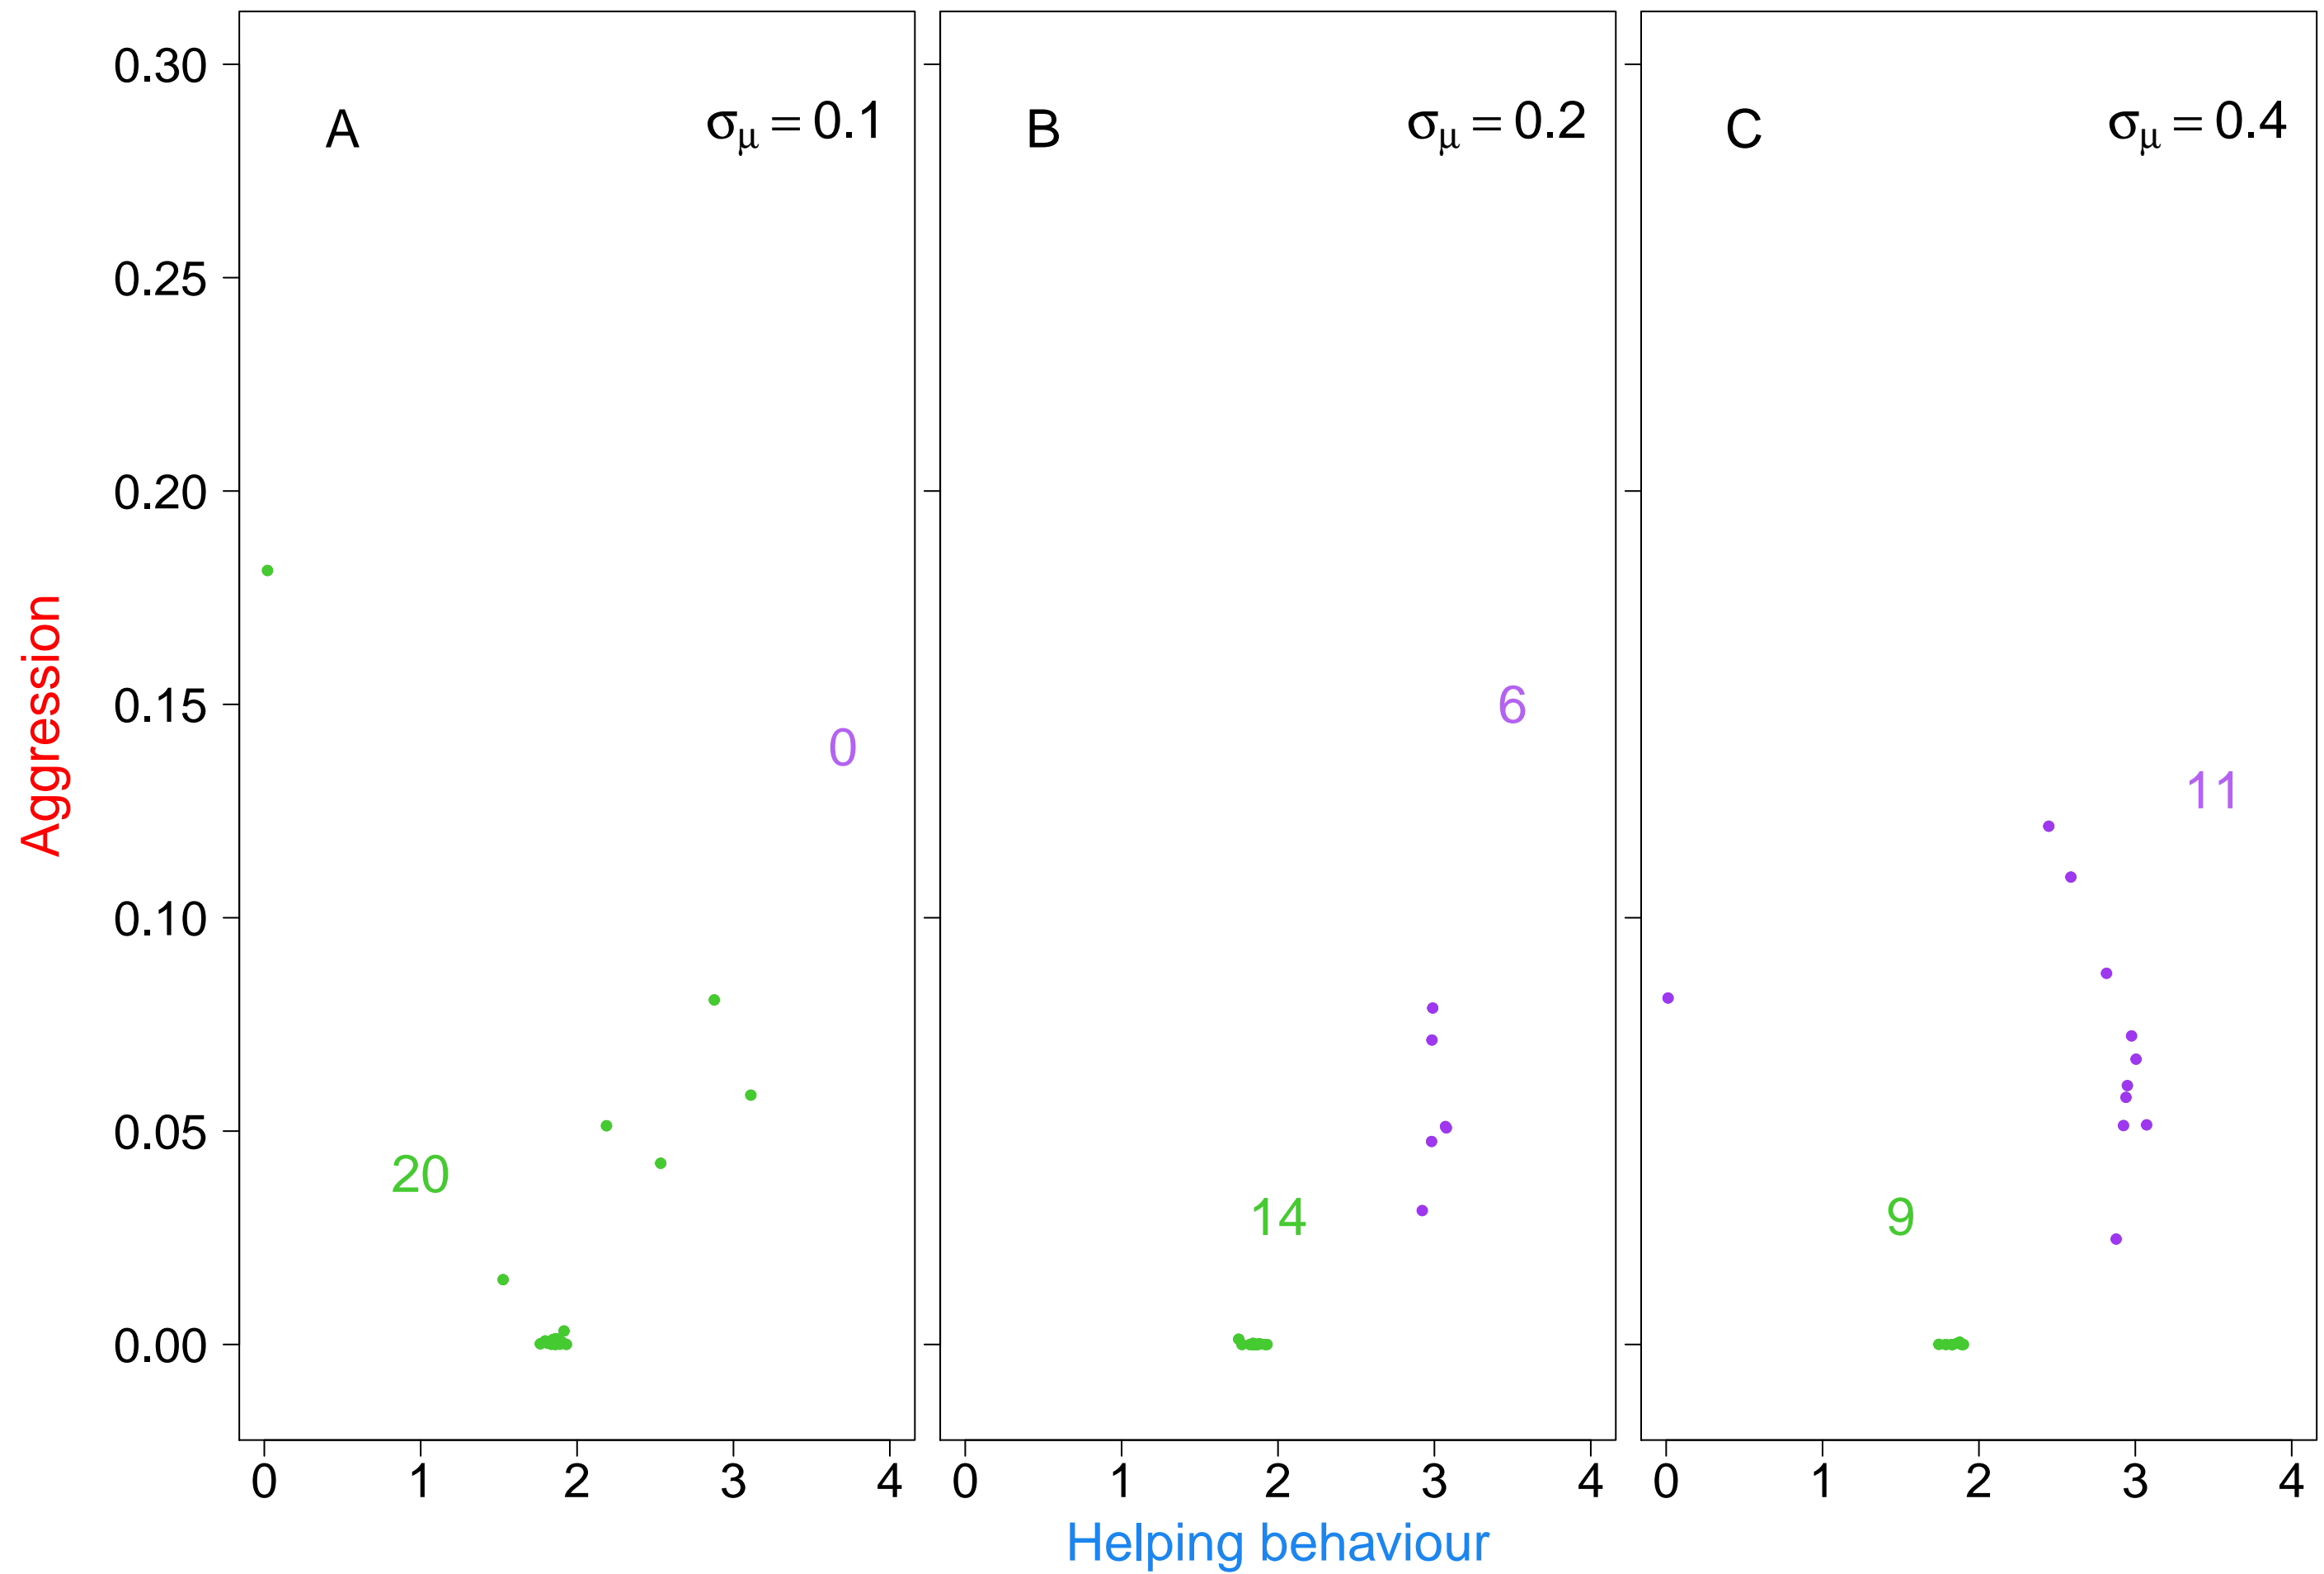

Supplement: rstb20150089supp4.pdf [file rstb20150089supp4.pdf]

Aggression

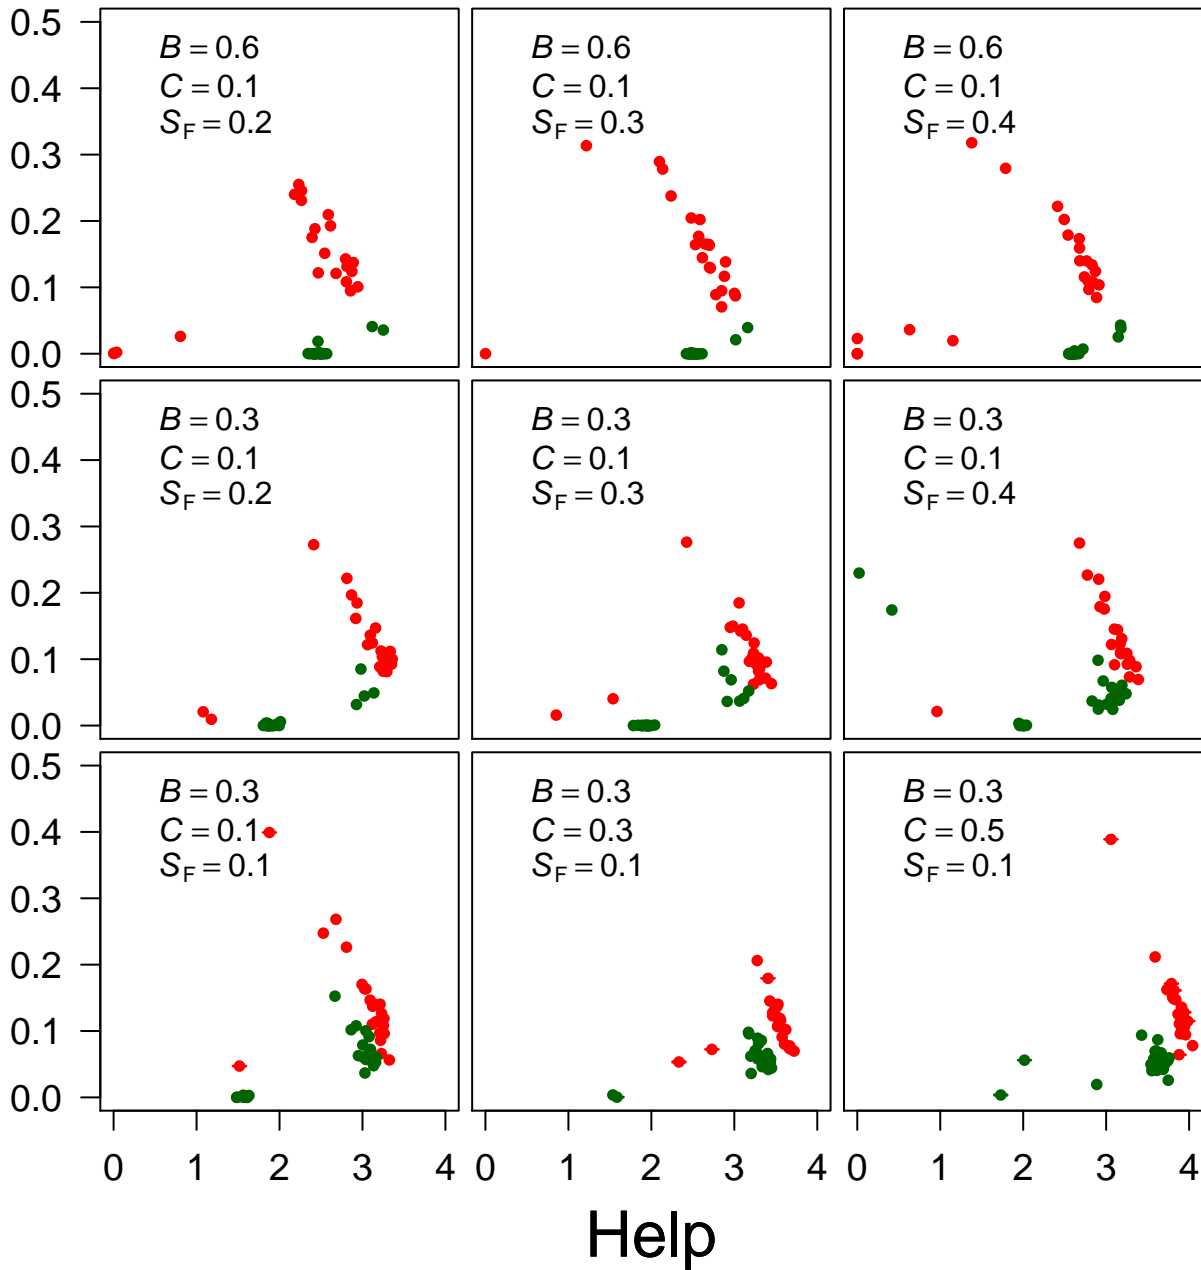

Supplement: rstb20150089supp5.pdf [file rstb20150089supp5.pdf]
